# Supplementary material for: Miceller media accelerated Baylis–Hillman reaction
Source: Royal Society of Chemistry journal article supplement (doi:10.1039/c1cy00278c), 2011-01-01

## Supporting information

### **Miceller media accelerated Baylis-Hillman reaction**

Balu Pawar,<sup>a</sup> Vikas Padalkar,<sup>a</sup> Kiran Phatangare,<sup>a</sup> Sudhakar Nirmalkar,<sup>a</sup> Atul Chaskar\*<sup>b</sup>

<sup>a</sup>Department of Chemistry, Postgraduate and Research Centre, C. K. Thakur College,  
Navi Mumbai, Maharashtra, India

<sup>b</sup>Department of Chemistry, National Taiwan University, Taipei 106, Taiwan.

E-mail: [achaskar@rediffmail.com](mailto:achaskar@rediffmail.com), Ph:+886-0917352249

---

**S1** – IR spectra

**S2**- Mass spectra

**S3**-<sup>1</sup>HNMR spectra

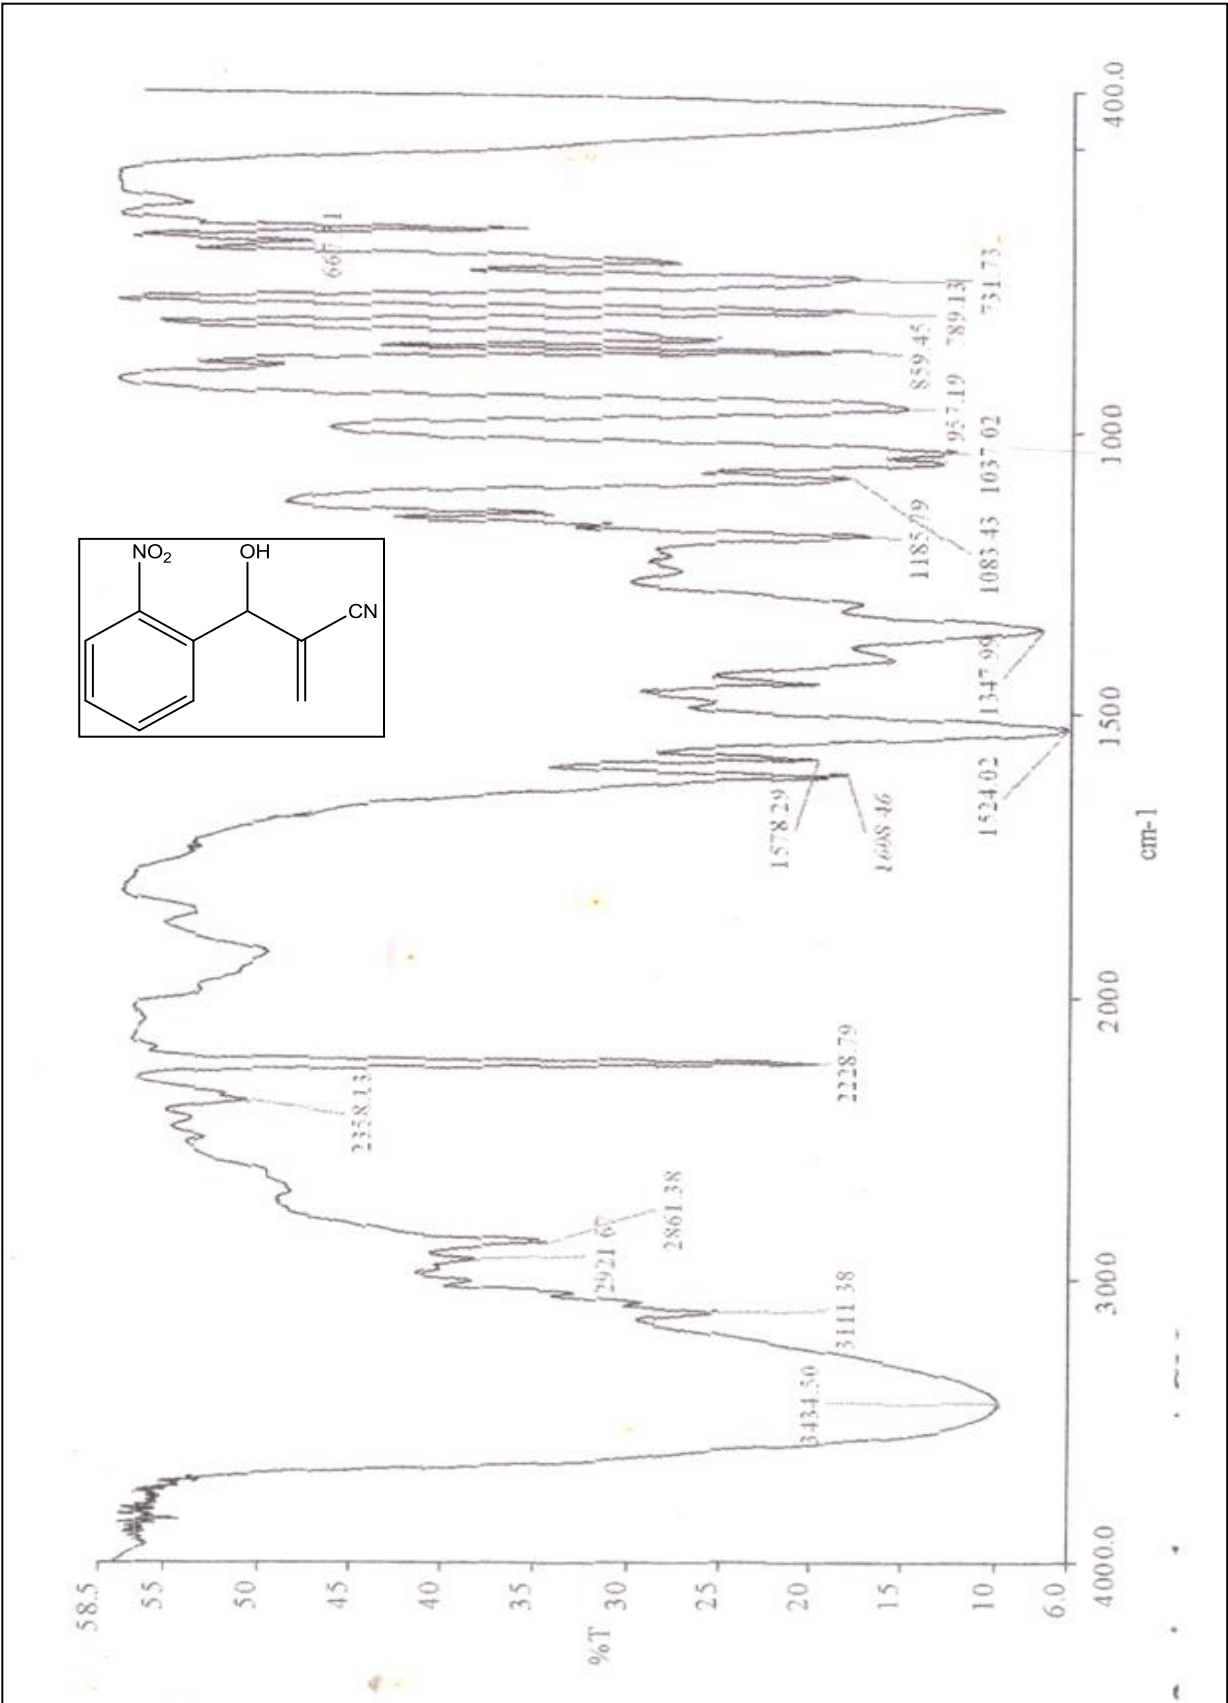

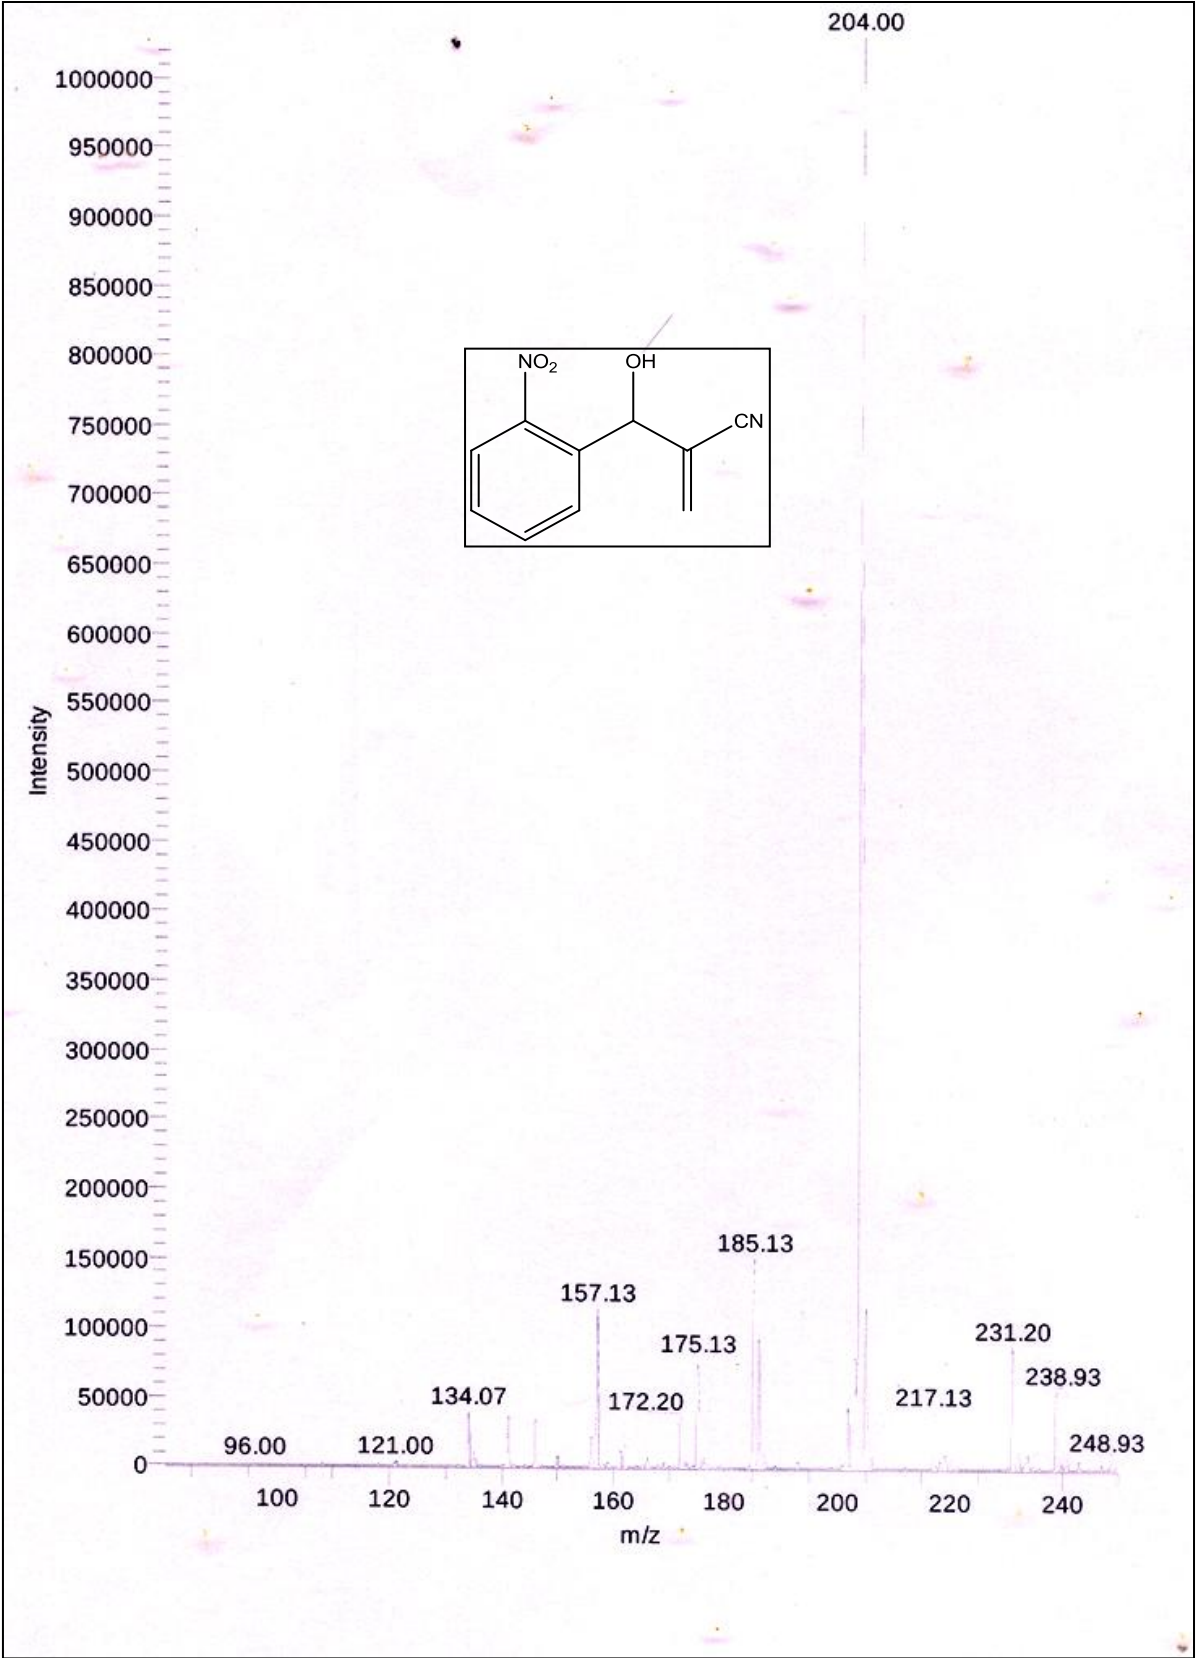

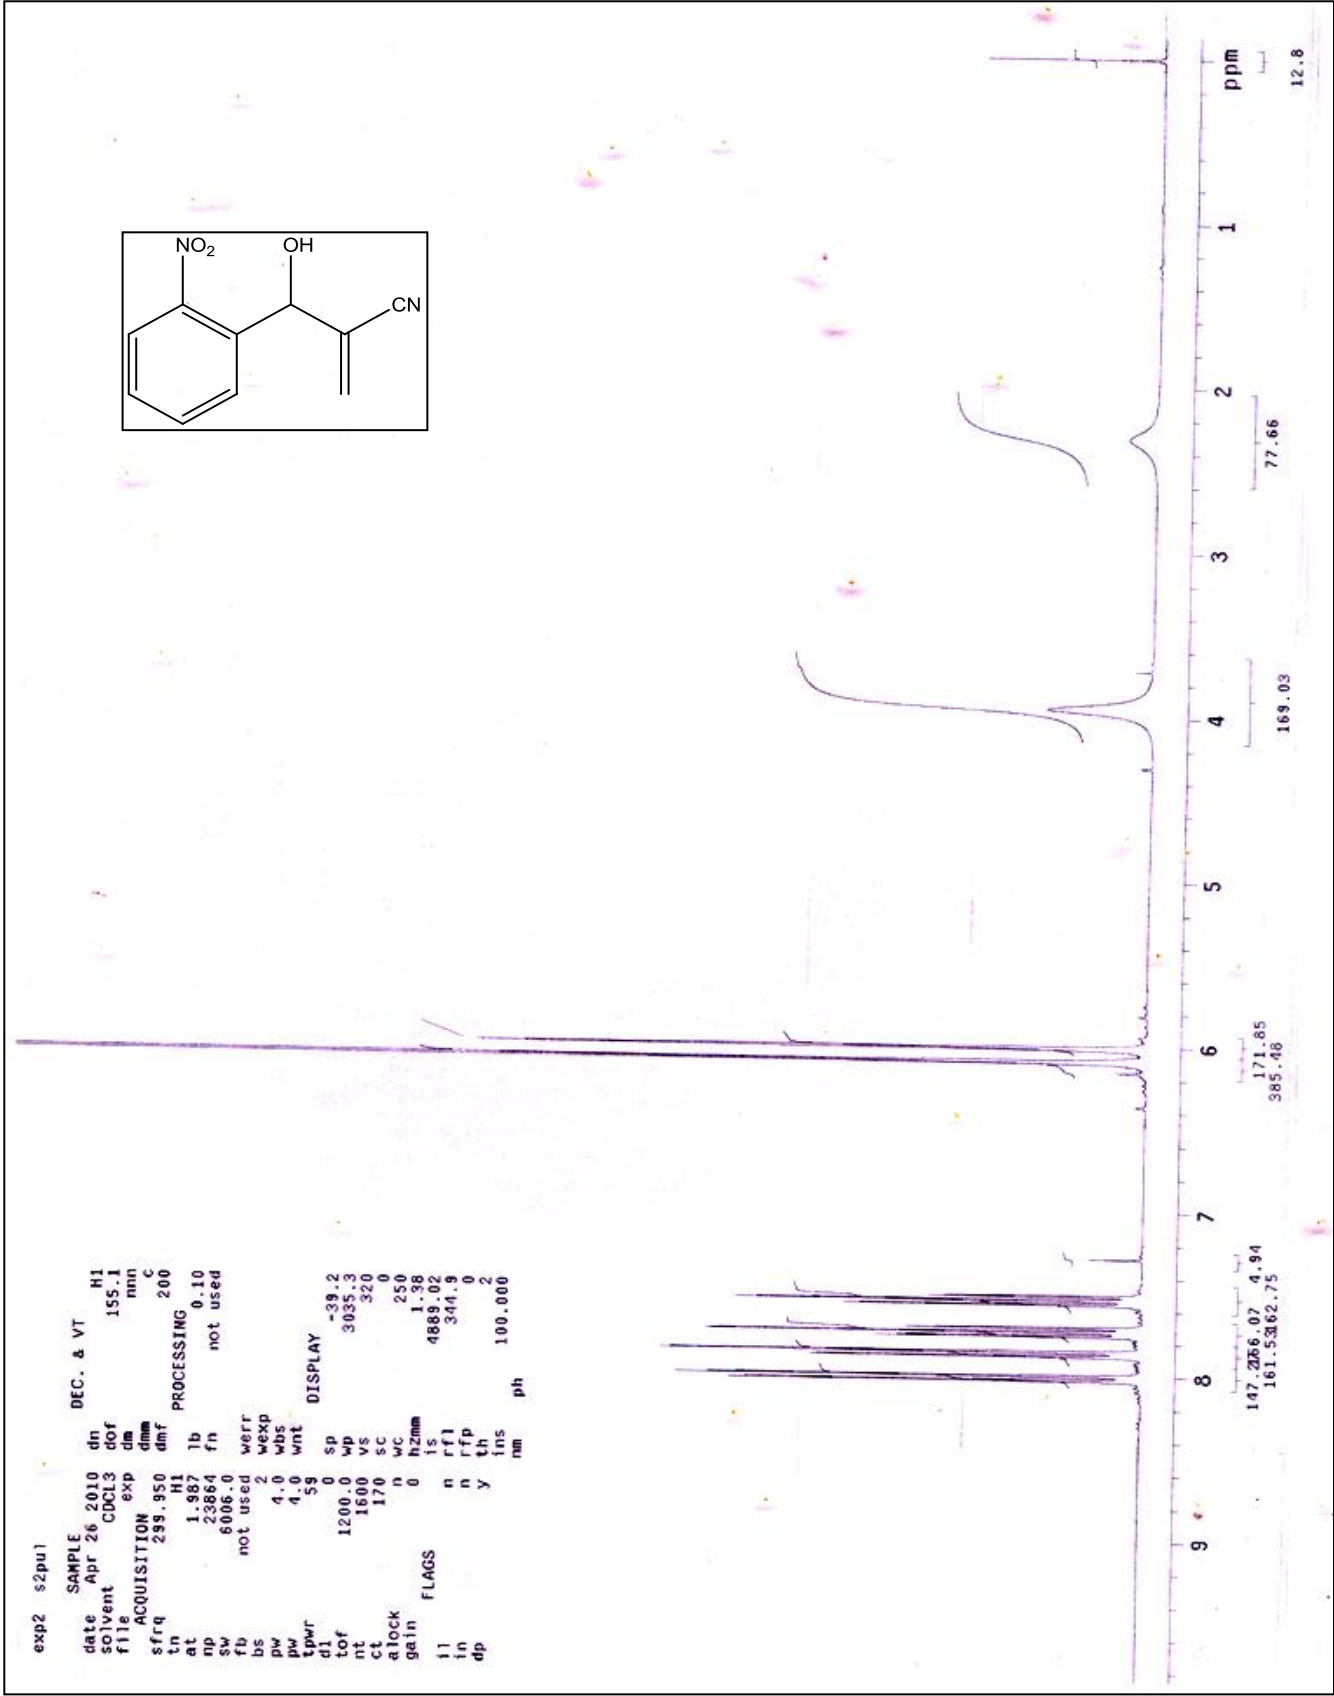

Supplement: c1cy00278c.pdf [file c1cy00278c.pdf]
